# Supplementary material for: Post-acute surgical ward round proforma improves documentation
Source: PubMed Central journal article supplement — BMJ Qual Improv Rep. 2013 May 17;2(1):u201042.w688. doi: 10.1136/bmjquality.u201042.w688 (PMC4652723; doi:10.1136/bmjquality.u201042.w688), 2013-05-17
Supplement: bmjqir-2-u201042-w688-s1.pdf [file bmjqir-2-u201042-w688-s1.pdf]

| <b>WARD ROUND SUMMARY</b>                                                                           |                                                                                    | <b>Date</b> | <b>Time:</b>          |
|-----------------------------------------------------------------------------------------------------|------------------------------------------------------------------------------------|-------------|-----------------------|
| <i>(attach patient label or complete fully)</i><br><b>Patients full name</b><br><br><b>NHI.....</b> | <b>Consultant / Fellow / Registrar</b> <i>(circle)</i>                             |             | <b>DRAFT DOCUMENT</b> |
|                                                                                                     | <b>Diagnosis</b>                                                                   |             |                       |
| <b>Comments</b>                                                                                     | <b>Discharge: Yes / No</b>                                                         |             |                       |
|                                                                                                     | <b>Follow up instructions:</b><br>GP care<br>OP clinic:.....wks<br>Other (specify) |             |                       |
|                                                                                                     | <b>Signed</b>                                                                      |             |                       |
| <b>Diet</b><br><b>NBM /30ml/hr /CF /FF / Full</b> <i>(circle)</i>                                   |                                                                                    |             |                       |

**Figure 1:** Proforma

**Table 1** Number and percentage of cases with specified time and date, signature, impression and dietary plan in the notes after PACWR before and after the introduction of the proforma; A) Regardless of whether a proforma was filled out, B) Restricted to cases with a proforma filled out

| <b>A</b>                           | <b>Before<br/>N (%)</b> | <b>After<br/>N (%)</b> | <b>P-value</b> |
|------------------------------------|-------------------------|------------------------|----------------|
| <b>Date and time</b>               | 40 (37)                 | 75 (72)                | <0.01*         |
| <b>Signature</b>                   | 94 (87)                 | 89 (89)                | 0.89           |
| <b>Impression</b>                  | 43 (40)                 | 63 (61)                | <0.01*         |
| <b>Dietary plan</b>                | 54 (50)                 | 62 (60)                | 0.13           |
| <b>All of the above documented</b> | 14 (13)                 | 32 (31)                | <0.01*         |
| <b>Total</b>                       | 108 (100)               | 103(100)               |                |

\* Statistically significant

| <b>B</b>                           | <b>Before<br/>N (%)</b> | <b>After<br/>N (%)</b> | <b>P-value</b> |
|------------------------------------|-------------------------|------------------------|----------------|
| <b>Date and time</b>               | 40 (37)                 | 61 (78)                | <0.01*         |
| <b>Signature</b>                   | 94 (86)                 | 70 (90)                | 0.57           |
| <b>Impression</b>                  | 43 (40)                 | 55 (75)                | <0.01*         |
| <b>Dietary plan</b>                | 54 (50)                 | 53 (68)                | <0.05*         |
| <b>All of the above documented</b> | 14 (13)                 | 27 (35)                | <0.01*         |
| <b>Total</b>                       | 108 (100)               | 78 (100)               |                |

\* Statistically significant

**Table 2** Number and percentage of cases for which the nurses were unsure of their dietary plan and had to contact the surgical team after PACWR before and after the introduction of the proforma

|                                                   | <b>Before<br/>N (%)</b> | <b>After<br/>N (%)</b> | <b>P-value</b> |
|---------------------------------------------------|-------------------------|------------------------|----------------|
| <b>Nurse unsure of the patients' dietary plan</b> | 15 (20)                 | 11 (12)                | 0.13           |
| <b>Nurse contacted the team for clarification</b> | 9 (12)                  | 8 (9)                  | 0.45           |
| <b>Total</b>                                      | 73 (100)                | 92 (100)               |                |
